# Supplementary material for: Effects of Microtopography on Soil Microbial Community Structure and Abundance in Permafrost Peatlands
Source: MDPI journal article supplement (doi:10.3390/microorganisms12050867), 2024-04-26
Supplement: s1 [file s1]

## Supplementary Material

**Table S1.** Summaries of sequencing rRNA library.

|          | Samples | Raw reads | Clean reads | Effective reads | Mean length(bp) |
|----------|---------|-----------|-------------|-----------------|-----------------|
| Bacteria | 27      | 1039821   | 1027584     | 615579          | 416             |
| Fungi    | 27      | 1346093   | 1220376     | 797135          | 261             |

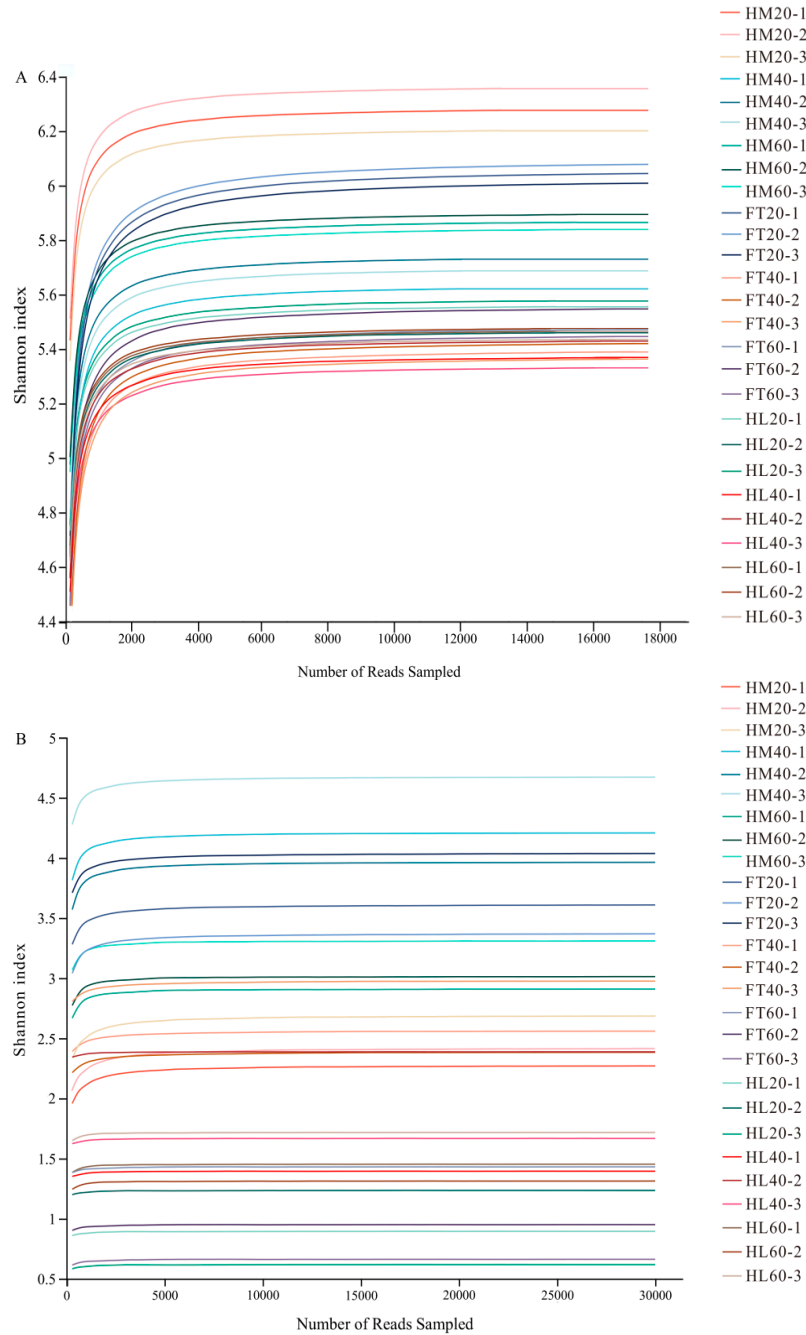

**Figure S1.** Rarefaction curves for all samples: (A) curves for bacterial sequences; (B) curves for fungal sequences.
